# Supplementary material for: pH variation induced construction of a series of entangled frameworks based on bi- and tri-metallic cores as nodes
Source: Royal Society of Chemistry journal article supplement (doi:10.1039/c1ce05810j), 2011-10-14
Supplement: c1ce05810j.pdf [file c1ce05810j.pdf]

## **pH variation induced construction of a series of entangled frameworks based on bi- and trimetallic Cores as Nodes**

Lian-Jie Li, Chao Qin, Xin-Long Wang, Shuang Wang, Liang Zhao,\* Guang-Sheng Yang, Hai-Ning Wang, Gang Yuan, Kui-Zhan Shao and Zhong-Min Su\*

*Institute of Functional Material Chemistry, Faculty of Chemistry, Northeast Normal University, Changchun, 130024, People's Republic of China*

\*Corresponding author. Tel.: (+86)-431-5099108.

E-mail address: [zmsu@nenu.edu.cn](mailto:zmsu@nenu.edu.cn)

Compound **1** :

IR (KBr pellet,  $\text{cm}^{-1}$ ): 3440.45 (w), 2852.72 (s), 1625.96 (w), 1508.97 (m), 1443.64 (m), 1371.94 (m), 1230.61 (m), 1108.14 (s), 1063.86 (s), 1028.35 (s), 935.28 (s), 818.65 (m), 787.18 (m), 760.67 (m), 717.89 (m), 489.61 (w), 434.07 (w).

Compound **2** :

IR (KBr pellet,  $\text{cm}^{-1}$ ): 3419.33 (m), 2922.07 (s), 2461.64 (s), 1640.16 (w), 1567.67 (m), 1508.99 (w), 1443.37 (w), 383.71 (w), 1229.77 (w), 1106.78 (m), 1041.89 (m), 932.67 (s), 873 (s), 814.51 (m), 760.19 (m), 719.51 (m), 607 (s).

Compound **3** :

IR (KBr pellet,  $\text{cm}^{-1}$ ): 3861 (w) 3744 (w), 2897 (s), 2854(s), 1562 (m), 1508 (m), 1449 (m), 1030 (s), 719 (m), 514 (m), 447 (m).

Compound **4** :

IR (KBr pellet,  $\text{cm}^{-1}$ ): 3897.11 (s), 3648.56 (s), 3619.73 (s), 3860 (s), 1064.33 (m), 939.60 (m), 1739.20 (m), 1286.68 (m), 1113.04 (m), 1564.01 (w), 1645.65 (w), 1513.65 (w), 1678.71 (w), 773.23 (w).

Compound **5** :

IR (KBr pellet,  $\text{cm}^{-1}$ ): 3076.76 (s), 1708.49 (m), 1708.49 (m), 1625.27 (m), 1509.14 (s), 1423.96 s), 1219.55 (w), 1165.45 (m), 1107.12 (m), 1027.74 (m), 934.85 (w), 817.13 (w), 769.17 (w), 710.08 (w), 661.48 (w), 536.69 (w), 481.23 (w), 422.26 (w).

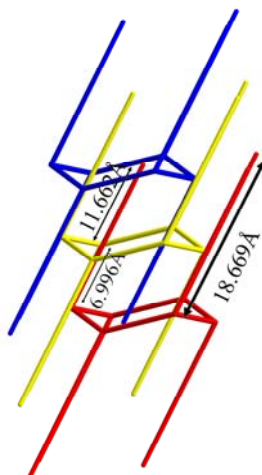

**Fig. S1** A schematic illustration of three cyclohexane conformation in the compound **2**.

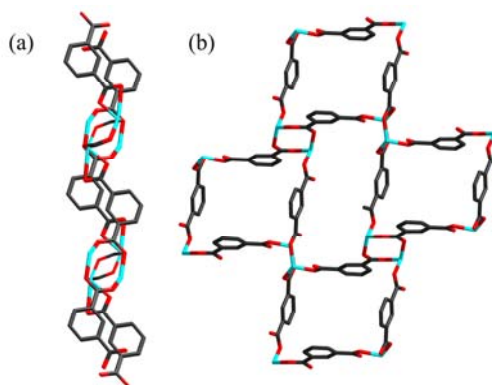

**Fig. S2** (a) Side and (b) front views of one Zn<sup>II</sup>-carboxylate layer with built from paddle-wheel shaped dinuclear Zn units in the bc plane.

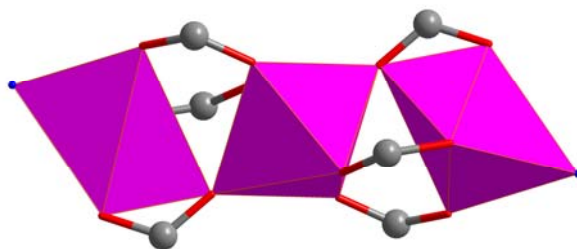

**Fig. S3** Schematic representation of inorganic SBU in the compound **4**.

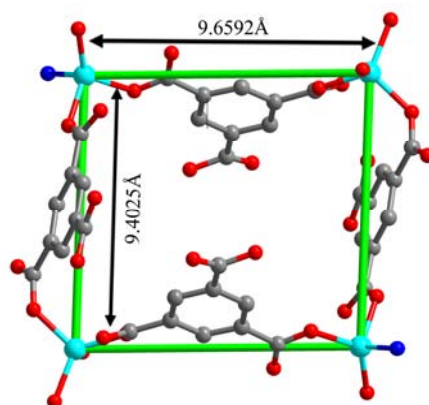

**Fig. S4** Schematic view of the squares in the compound **5**

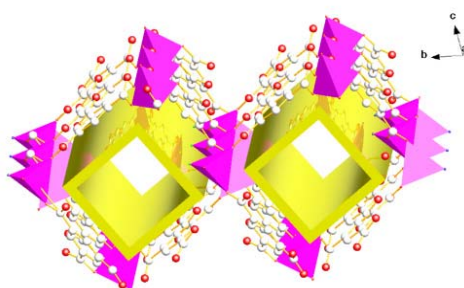

**Fig. S5** Schematic representation of the tube structure in the compound **5**.

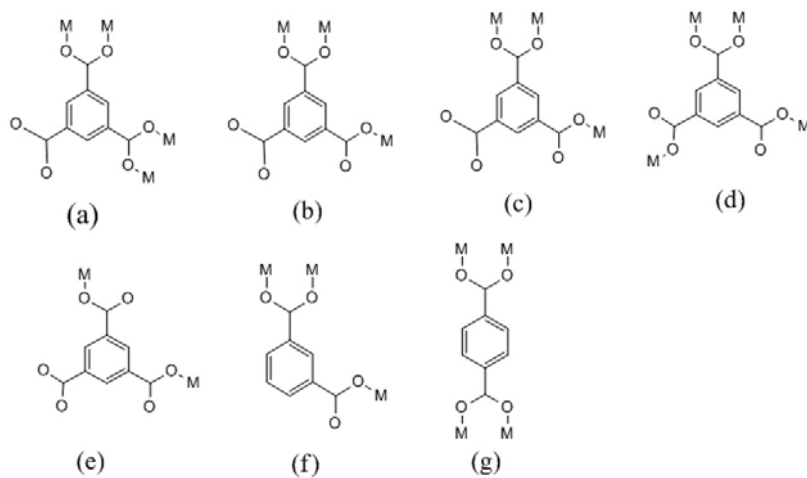

**Fig. S6** Coordination modes of aromatic carboxyl ligands in **1-5**

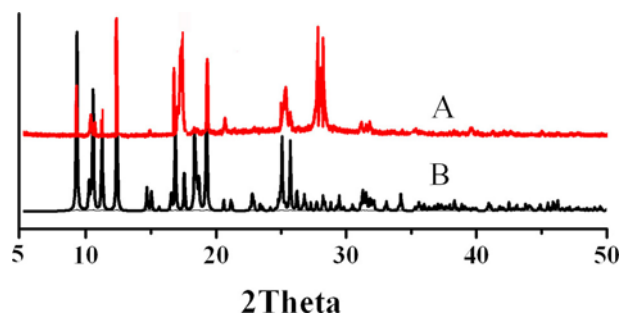

**Fig. S7** Simulated and experimental PXRD spectra of **1**: A as-synthesized; B

simulated.

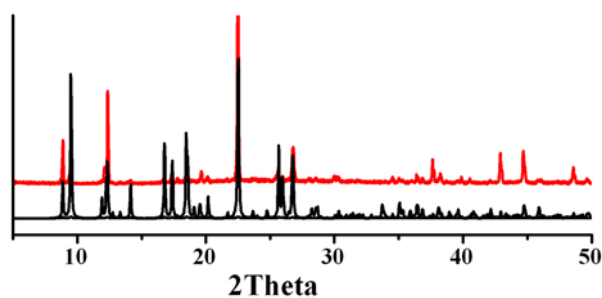

**Fig. S8** Simulated and experimental PXRD spectra of **2**: A as-synthesized; B

simulated.

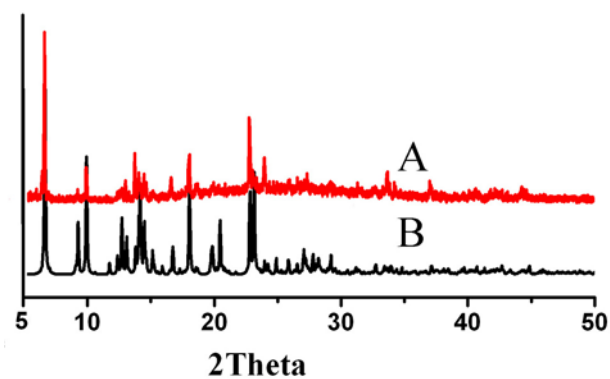

**Fig. S9** Simulated and experimental PXRD spectra of **3**: A as-synthesized; B

simulated.

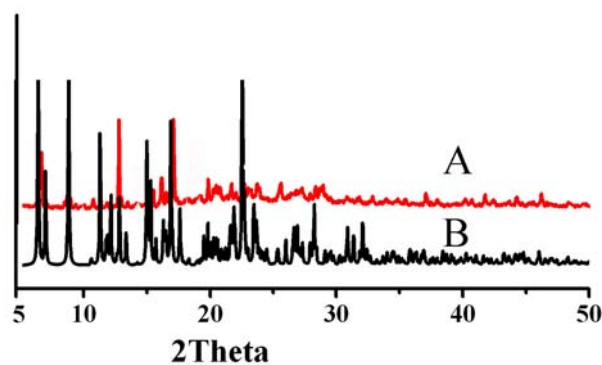

**Fig. S10** Simulated and experimental PXRD spectra of **4**: A as-synthesized; B

simulated.

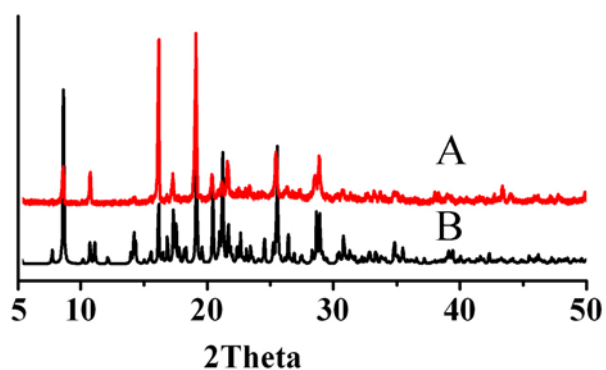

**Fig. S11** Simulated and experimental PXRD spectra of **5**: A as-synthesized; B simulated.

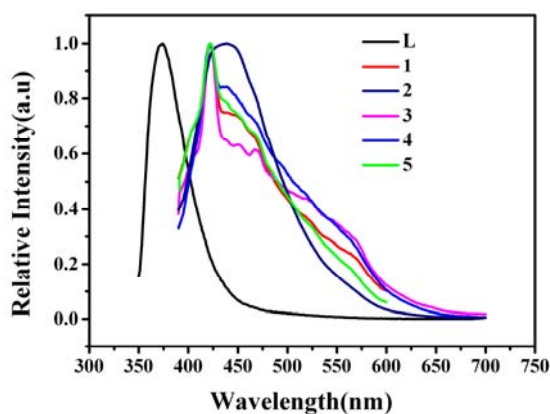

**Fig. S12** Emission spectra of compounds **1**, **2**, **3**, **4**, **5** and **L** in the solid state at room temperature.

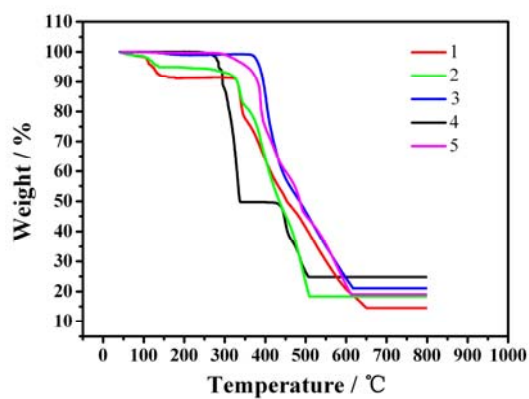

**Fig. S13** The TG curves of **1-5**

**Table S1** Crystal data and structure refinements for complexes **1-5**.

| Complex | <b>1</b>                    | <b>2</b>                    | <b>3</b>                    | <b>4</b>                    | <b>5</b>                    |
|---------|-----------------------------|-----------------------------|-----------------------------|-----------------------------|-----------------------------|
| Formula | $C_{54}H_{42}N_4O_{17}Zn_2$ | $C_{36}H_{26}N_2O_{15}Zn_2$ | $C_{34}H_{26}N_2O_{11}Zn_2$ | $C_{42}H_{28}N_2O_{14}Zn_3$ | $C_{36}H_{26}N_2O_{15}Zn_2$ |
| Formula | 1149.70                     | 857.37                      | 769.33                      | 980.83                      | 857.37                      |

|                                       |             |            |            |            |            |
|---------------------------------------|-------------|------------|------------|------------|------------|
| weight                                |             |            |            |            |            |
| Crystal system                        | Monoclinic  | Monoclinic | Monoclinic | Triclinic  | Triclinic  |
| Space group                           | $P2_1/c$    | $P2_1/c$   | $C2/c$     | $P\bar{1}$ | $P\bar{1}$ |
| $a/\text{Å}$                          | 26.912(2)   | 8.359(3)   | 15.236(1)  | 10.253(1)  | 8.538(1)   |
| $b/\text{Å}$                          | 14.301(13)  | 16.453(12) | 13.873(2)  | 10.665(3)  | 11.780(2)  |
| $c/\text{Å}$                          | 13.659(3)   | 25.367(4)  | 15.344(4)  | 10.740(1)  | 17.055(3)  |
| $\alpha/^\circ$                       | 90.         | 90         | 90.        | 94.601(13) | 78.041(2)  |
| $\beta/^\circ$                        | 98.357(2)   | 94.624(3)  | 109.954(1) | 113.788(1) | 77.984(4)  |
| $\gamma/^\circ$                       | 90          | 90         | 90.        | 110.685(2) | 78.729(12) |
| $V/\text{Å}^3$                        | 5201(3)     | 3477(2)    | 3048.54    | 970.7(8)   | 1620.4     |
| $Z$                                   | 4           | 4          | 1          | 1          | 2          |
| $D_{\text{calcd.}}[\text{g cm}^{-3}]$ | 1.466       | 1.634      | 1.672      | 1.678      | 1.757      |
| $\mu/\text{mm}^{-1}$                  | 1.000       | 1.458      | 1.643      | 1.914      | 1.565      |
| $F(000)$                              | 2352        | 1736       | 1560.0     | 497.07     | 872        |
| Observed                              |             |            |            |            |            |
| reflection/unique                     | 30392/11709 | 20935/8174 | 8663/3279  | 5913/4307  | 9855/7185  |
| $R_{\text{int}}$                      | 0.1622      | 0.0346     | 0.0317     | 0.0181     | 0.0213     |

**Table S2** Selected bond lengths (Å) and angles (°) for complexes **1-5<sup>a</sup>**

| Complex 1        |           |                  |           |
|------------------|-----------|------------------|-----------|
| Zn(2)-N(1)       | 2.044(12) | Zn(1)-N(3)       | 2.025(11) |
| Zn(1)-O(1)       | 2.036(10) | Zn(2)-O(2)       | 2.049(11) |
| Zn(2)-O(3)A      | 2.107(11) | Zn(1)-O(4) A     | 2.045(10) |
| Zn(2)-O(5)       | 2.024(10) | Zn(1)-O(7)       | 2.078(11) |
| Zn(2)-O(8)       | 2.038(10) | N(3)-Zn(1)-O(6)  | 95.6(5)   |
| N(3)-Zn(1)-O(1)  | 102.0(5)  | O(6)-Zn(1)-O(1)  | 161.1(4)  |
| N(3)-Zn(1)-O(4)A | 111.7(5)  | O(6)-Zn(1)-O(4)A | 91.4(5)   |
| O(1)-Zn(1)-O(4)A | 88.5(4)   | N(3)-Zn(1)-O(7)  | 94.5(5)   |
| O(6)-Zn(1)-O(7)  | 85.5(5)   | O(1)-Zn(1)-O(7)  | 86.2(5)   |

|                   |            |                   |            |
|-------------------|------------|-------------------|------------|
| O(7)-Zn(1)-O(4)A  | 153.7(4)   | O(5)-Zn(2)-O(8)   | 90.5(4)    |
| O(5)-Zn(2)-N(1)   | 105.9(5)   | O(8)-Zn(2)-N(1)   | 103.2(5)   |
| O(5)-Zn(2)-O(2)   | 156.3(4)   | O(8)-Zn(2)-O(2)   | 93.1(5)    |
| N(1)-Zn(2)-O(2)   | 96.1(5)    | O(5)-Zn(2)-O(3)A  | 85.6(5)    |
| O(8)-Zn(2)-O(3)A  | 161.9(4)   | N(1)-Zn(2)-O(3)A  | 94.8(5)    |
| O(2)-Zn(2)-O(3)A  | 83.7(5)    |                   |            |
| <b>Complex 2</b>  |            |                   |            |
| Zn(1)-O(4)A       | 1.951(3)   | Zn(2)-O(6)A       | 1.945(3)   |
| Zn(1)-N(1)        | 2.030(3)   | Zn(1)-O(3)        | 1.982(3)   |
| Zn(2)-O(5)        | 1.966(3)   | Zn(2)-O(8)B       | 2.000(3)   |
| Zn(1)-O(13)       | 2.076(3)   | Zn(2)-O(14)       | 1.937(3)   |
| Zn(1)-O(4)A       | 1.951(3)   | O(4)A-Zn(1)-O(3)  | 134.82(12) |
| O(4)A-Zn(1)-N(1)  | 116.82(12) | O(3)-Zn(1)-N(1)   | 105.78(13) |
| O(4)A-Zn(1)-O(13) | 102.00(13) | O(3)-Zn(1)-O(13)  | 92.97(13)  |
| N(1)-Zn(1)-O(13)  | 88.65(11)  | O(14)-Zn(2)-O(6)A | 110.48(15) |
| O(14)-Zn(2)-O(5)  | 119.55(13) | O(6)A-Zn(2)-O(5)  | 96.21(14)  |
| O(14)-Zn(2)-O(8)B | 101.85(12) | O(6)A-Zn(2)-O(8)B | 101.41(12) |
| O(5)-Zn(2)-O(8)B  | 125.19(13) |                   |            |
| <b>Complex 3</b>  |            |                   |            |
| Zn(1)-O(2)        | 1.952(3)   | Zn(1)-O(7)A       | 1.977(2)   |
| Zn(1)-O(3)B       | 1.976(2)   | Zn(1)-N(1)        | 2.025(3)   |
| O(2)-Zn(1)-O(7)A  | 108.40(12) | O(2)-Zn(1)-O(3)B  | 100.05(11) |
| O(7)A-Zn(1)-O(3)B | 122.01(11) | O(2)-Zn(1)-N(1)   | 132.97(13) |
| O(7)A-Zn(1)-N(1)  | 99.41(11)  | O(3)B-Zn(1)-N(1)  | 96.07(11)  |
| <b>Complex 4</b>  |            |                   |            |
| Zn(1)-O(2)        | 2.0738(17) | Zn(1)-O(3)A       | 2.084(2)   |
| Zn(1)-O(5)        | 2.150(2)   | Zn(2)-O(6)        | 1.930(2)   |
| Zn(2)-O(1)        | 1.9342(18) | Zn(2)-O(4)        | 1.979(2)   |
| Zn(2)-N(1)        | 2.047(2)   | O(2)-Zn(1)-O(2)A  | 180.00(10) |
| O(2)-Zn(1)-O(3)A  | 88.74(7)   | O(2)A-Zn(1)-O(3)A | 91.26(7)   |
| O(2)-Zn(1)-O(5)   | 94.90(8)   | O(2)A-Zn(1)-O(5)  | 85.10(8)   |

|                   |            |                   |            |
|-------------------|------------|-------------------|------------|
| O(3)A-Zn(1)-O(5)  | 91.67(8)   | O(3)-Zn(1)-O(5)   | 88.33(8)   |
| O(2)A-Zn(1)-O(5)A | 94.90(8)   | O(6)-Zn(2)-O(1)   | 117.39(9)  |
| O(6)-Zn(2)-O(4)   | 104.45(9)  | O(1)-Zn(2)-O(4)   | 128.21(9)  |
| O(6)-Zn(2)-N(1)   | 110.30(9)  | O(1)-Zn(2)-N(1)   | 91.31(8)   |
| O(4)-Zn(2)-N(1)   | 101.90(9)  |                   |            |
| <b>Complex 5</b>  |            |                   |            |
| Zn(1)-N(1)        | 2.046(3)   | Zn(1)-O(4)        | 1.943(3)   |
| Zn(2)-O(7)        | 1.913(3)   | Zn(2)-O(8)        | 1.952(3)   |
| Zn(1)-O(11)       | 1.979(2)   | Zn(1)-O(14)       | 1.919(3)   |
| Zn(2)-O(13)       | 1.945(3)   | Zn(2)-O(1W)       | 1.977(3)   |
| O(14)-Zn(1)-O(4)  | 124.29(11) | O(14)-Zn(1)-O(11) | 114.24(12) |
| O(4)-Zn(1)-O(11)  | 101.57(12) | O(14)-Zn(1)-N(1)  | 110.88(12) |
| O(4)-Zn(1)-N(1)   | 100.38(12) | O(11)-Zn(1)-N(1)  | 102.70(12) |
| O(7)-Zn(2)-O(13)  | 104.83(13) | O(7)-Zn(2)-O(8)   | 114.79(13) |
| O(13)-Zn(2)-O(8)  | 103.92(12) | O(7)-Zn(2)-O(1W)  | 118.43(13) |
| O(13)-Zn(2)-O(1W) | 103.84(13) | O(8)-Zn(2)-O(1W)  | 109.23(12) |

<sup>a</sup>Symmetry transformations used to generate equivalent atoms: for **1**: A, x, 0.5-y, 0.5+z. for **2**: A, -x, 0.5 + y, 1.5-z; B, -x, -y, 1-z. for **3**: A, -1-x, -y, 1-z; B, x, -y, -0.5+z. for **4**: A, -x, 1-y, -z. for **5**: A, 2-x, 1-y, -z.

**Table S3** Distances (Å) and Angles (°) of Hydrogen bonds for compound **5**.

| D-H...A         | d(H...A) | d(D...A) | ∠D-H...A |
|-----------------|----------|----------|----------|
| O(1W)-H(A)-O8A  | 1.87(2)  | 2.705(4) | 175(4)   |
| O(1W)-H(B)-O18B | 1.93(3)  | 2.675(5) | 148(5)   |

Symmetry codes: A, -x, 2-y, 1-z; B, -1+x, y, z.
